# Supplementary material for: MiRNA-Related SNPs and Risk of Esophageal Adenocarcinoma and Barrett’s Esophagus: Post Genome-Wide Association Analysis in the BEACON Consortium
Source: PubMed Central journal article supplement (PMC4454432; doi:10.1371/journal.pone.0128617), 2015-06-03

**S3 Fig. Scatter plots of pairwise comparisons among the first four principal components.**

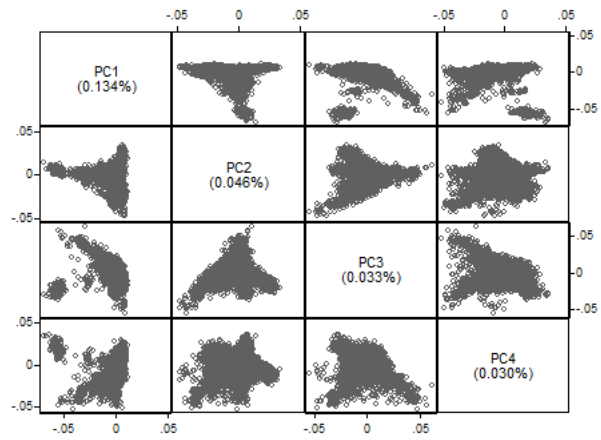

Supplement: pone.0128617.s003.pdf [file pone.0128617.s003.pdf]
