# Supplementary material for: MiRNA-Related SNPs and Risk of Esophageal Adenocarcinoma and Barrett’s Esophagus: Post Genome-Wide Association Analysis in the BEACON Consortium
Source: PubMed Central journal article supplement (PMC4454432; doi:10.1371/journal.pone.0128617), 2015-06-03
Supplement: pone.0128617.s005.pdf [file pone.0128617.s005.pdf]

**S1 Table. miRNAs reported to be expressed in normal squamous epithelium of the esophagus, BE, dysplastic epithelium, or EA.**

|           |           |           |             |           |             |            |             |            |             |
|-----------|-----------|-----------|-------------|-----------|-------------|------------|-------------|------------|-------------|
| <b>1</b>  | let-7a    | <b>32</b> | miR-30c     | <b>63</b> | miR-148b    | <b>94</b>  | miR-215     | <b>125</b> | miR-519d    |
| <b>2</b>  | let-7a-1  | <b>33</b> | miR-30d     | <b>64</b> | miR-149     | <b>95</b>  | miR-216a    | <b>126</b> | miR-543     |
| <b>3</b>  | let-7a-2  | <b>34</b> | miR-30e     | <b>65</b> | miR-152     | <b>96</b>  | miR-216b    | <b>127</b> | miR-548b-3p |
| <b>4</b>  | let-7b    | <b>35</b> | miR-31      | <b>66</b> | miR-155     | <b>97</b>  | miR-219-5p  | <b>128</b> | miR-557     |
| <b>5</b>  | let-7c    | <b>36</b> | miR-32      | <b>67</b> | miR-181a    | <b>98</b>  | miR-221     | <b>129</b> | miR-560     |
| <b>6</b>  | let-7d    | <b>37</b> | miR-33a     | <b>68</b> | miR-181a-1  | <b>99</b>  | miR-222     | <b>130</b> | miR-605     |
| <b>7</b>  | let-7f    | <b>38</b> | miR-33b     | <b>69</b> | miR-181a-2  | <b>100</b> | miR-223     | <b>131</b> | miR-615-3p  |
| <b>8</b>  | let-7i    | <b>39</b> | miR-92-1    | <b>70</b> | miR-181b    | <b>101</b> | miR-224     | <b>132</b> | miR-617     |
| <b>9</b>  | miR-7     | <b>40</b> | miR-92a     | <b>71</b> | miR-187     | <b>102</b> | miR-326     | <b>133</b> | miR-630     |
| <b>10</b> | miR-10a   | <b>41</b> | miR-93      | <b>72</b> | miR-190     | <b>103</b> | miR-330-5p  | <b>134</b> | miR-636     |
| <b>11</b> | miR-10b   | <b>42</b> | miR-99a     | <b>73</b> | miR-191     | <b>104</b> | miR-338-3p  | <b>135</b> | miR-663     |
| <b>12</b> | miR-15b   | <b>43</b> | miR-99b     | <b>74</b> | miR-192     | <b>105</b> | miR-338-5p  |            |             |
| <b>13</b> | miR-17    | <b>44</b> | miR-100     | <b>75</b> | miR-193a-3p | <b>106</b> | miR-342-3p  |            |             |
| <b>14</b> | miR-17-5p | <b>45</b> | miR-101     | <b>76</b> | miR-193a-5p | <b>107</b> | miR-342-5p  |            |             |
| <b>15</b> | miR-20a   | <b>46</b> | miR-103     | <b>77</b> | miR-193b    | <b>108</b> | miR-345     |            |             |
| <b>16</b> | miR-20b   | <b>47</b> | miR-103-1   | <b>78</b> | miR-194     | <b>109</b> | miR-355-5p  |            |             |
| <b>17</b> | miR-21    | <b>48</b> | miR-106a    | <b>79</b> | miR-194-1   | <b>110</b> | miR-369-3p  |            |             |
| <b>18</b> | miR-23a   | <b>49</b> | miR-107     | <b>80</b> | miR-195     | <b>111</b> | miR-369-5p  |            |             |
| <b>19</b> | miR-23b   | <b>50</b> | miR-125b    | <b>81</b> | miR-196a    | <b>112</b> | miR-370     |            |             |
| <b>20</b> | miR-24    | <b>51</b> | miR-126     | <b>82</b> | miR-197     | <b>113</b> | miR-375     |            |             |
| <b>21</b> | miR-25    | <b>52</b> | miR-135a    | <b>83</b> | miR-199a*   | <b>114</b> | miR-409-3p  |            |             |
| <b>22</b> | miR-26b   | <b>53</b> | miR-140-3p  | <b>84</b> | miR-199a-3p | <b>115</b> | miR-422b    |            |             |
| <b>23</b> | miR-27a   | <b>54</b> | miR-140-5p  | <b>85</b> | miR-199a-5p | <b>116</b> | miR-424     |            |             |
| <b>24</b> | miR-27b   | <b>55</b> | miR-143     | <b>86</b> | miR-199b-3p | <b>117</b> | miR-451     |            |             |
| <b>25</b> | miR-28-3p | <b>56</b> | miR-144     | <b>87</b> | miR-199b-5p | <b>118</b> | miR-483-3p  |            |             |
| <b>26</b> | miR-28-5p | <b>57</b> | miR-145     | <b>88</b> | miR-200a*   | <b>119</b> | miR-494     |            |             |
| <b>27</b> | miR-29a   | <b>58</b> | miR-146a    | <b>89</b> | miR-200c    | <b>120</b> | miR-497     |            |             |
| <b>28</b> | miR-29b   | <b>59</b> | miR-146b-3p | <b>90</b> | miR-203     | <b>121</b> | miR-509-3p  |            |             |
| <b>29</b> | miR-29c   | <b>60</b> | miR-146b-5p | <b>91</b> | miR-205     | <b>122</b> | miR-509-5p  |            |             |
| <b>30</b> | miR-30a   | <b>61</b> | miR-147     | <b>92</b> | miR-210     | <b>123</b> | miR-513     |            |             |
| <b>31</b> | miR-30b   | <b>62</b> | miR-148a    | <b>93</b> | miR-214     | <b>124</b> | miR-516a-5p |            |             |
