# Supplementary material for: MiRNA-Related SNPs and Risk of Esophageal Adenocarcinoma and Barrett’s Esophagus: Post Genome-Wide Association Analysis in the BEACON Consortium
Source: PubMed Central journal article supplement (PMC4454432; doi:10.1371/journal.pone.0128617), 2015-06-03
Supplement: pone.0128617.s008.pdf [file pone.0128617.s008.pdf]

**S4 Table. Three SNPs from the intersection of Tables 2 & 3, and risk of EA, BE, or [EA/BE].**

|   | SNP        | Gene     | Alleles <sup>†</sup> | EA   |             |        | BE   |             |        | EA/BE |             |        |
|---|------------|----------|----------------------|------|-------------|--------|------|-------------|--------|-------|-------------|--------|
|   |            |          |                      | OR*  | 95% CI      | P      | OR*  | 95% CI      | P      | OR*   | 95% CI      | P      |
| 1 | rs1644730  | RDH8     | A/T                  | 0.88 | (0.81-0.95) | 0.0011 | 0.93 | (0.86-1.00) | 0.0384 | 0.91  | (0.85-0.97) | 0.0026 |
| 2 | rs12534337 | miR-4467 | A/G                  | 1.28 | (1.06-1.55) | 0.0095 | 1.25 | (1.05-1.48) | 0.0106 | 1.27  | (1.09-1.48) | 0.0027 |
| 3 | rs7526812  | miR-3117 | C/T                  | 1.14 | (1.02-1.27) | 0.0195 | 1.11 | (1.00-1.22) | 0.0456 | 1.12  | (1.03-1.22) | 0.0112 |

<sup>†</sup>Minor/major alleles, \*OR adjusted for age, sex, ev1-ev4 using additive model (per-allele)
