# Supplementary material for: MiRNA-Related SNPs and Risk of Esophageal Adenocarcinoma and Barrett’s Esophagus: Post Genome-Wide Association Analysis in the BEACON Consortium
Source: PubMed Central journal article supplement (PMC4454432; doi:10.1371/journal.pone.0128617), 2015-06-03
Supplement: pone.0128617.s009.pdf [file pone.0128617.s009.pdf]

**S5 Table. MiRNA-related SNPs and risk of EA stratified by smoking history or BMI.**

**A.**

| SNP        | Pack-years                 |                            |                             |                            |                            | P-int |
|------------|----------------------------|----------------------------|-----------------------------|----------------------------|----------------------------|-------|
|            | 0                          | >0 & <15                   | 15-29                       | 30-44                      | 45+                        |       |
|            | OR (95% CI)<br>P           | OR (95% CI)<br>P           | OR (95% CI)<br>P            | OR (95% CI)<br>P           | OR (95% CI)<br>P           |       |
| rs1644730  | 0.84 (0.70-1.01)<br>0.0677 | 0.88 (0.67-1.15)<br>0.3589 | 0.86 (0.65-1.13)<br>0.2678  | 0.91 (0.70-1.18)<br>0.4744 | 0.86 (0.66-1.11)<br>0.2388 | 0.97  |
| rs17880825 | 0.97 (0.55-1.71)<br>0.9086 | 1.03 (0.43-2.46)<br>0.956  | 4.87 (1.94-12.22)<br>0.0007 | 1.70 (0.65-4.41)<br>0.2795 | 1.98 (0.68-5.79)<br>0.2116 | 0.10  |
| rs1045968  | 0.97 (0.75-1.26)<br>0.8313 | 1.10 (0.77-1.58)<br>0.6062 | 1.10 (0.78-1.56)<br>0.5882  | 1.15 (0.78-1.68)<br>0.4828 | 1.51 (1.04-2.20)<br>0.0302 | 0.07  |
| rs1050629  | 0.65 (0.36-1.18)<br>0.1561 | 2.22 (1.05-4.69)<br>0.0371 | 1.71 (0.75-3.94)<br>0.2047  | 1.41 (0.65-3.06)<br>0.3834 | 1.29 (0.61-2.74)<br>0.5015 | 0.60  |
| rs2075993  | 1.02 (0.85-1.22)<br>0.8498 | 0.82 (0.63-1.08)<br>0.1554 | 0.91 (0.69-1.20)<br>0.5034  | 0.79 (0.59-1.05)<br>0.0982 | 0.82 (0.64-1.06)<br>0.1279 | 0.45  |
| kgp1460594 | 1.23 (0.89-1.72)<br>0.208  | 1.83 (1.11-3.02)<br>0.0186 | 1.11 (0.69-1.79)<br>0.669   | 1.04 (0.66-1.66)<br>0.8573 | 1.15 (0.72-1.83)<br>0.5503 | 0.41  |

**B.**

| SNP        | BMI                        |                            |                            |                            | P-int |
|------------|----------------------------|----------------------------|----------------------------|----------------------------|-------|
|            | <25                        | 25-29.9                    | 30-34.9                    | 35+                        |       |
|            | OR (95% CI)<br>P           | OR (95% CI)<br>P           | OR (95% CI)<br>P           | OR (95% CI)<br>P           |       |
| rs1644730  | 0.74 (0.60-0.91)<br>0.005  | 0.89 (0.76-1.05)<br>0.1542 | 0.86 (0.66-1.12)<br>0.2632 | 0.87 (0.58-1.32)<br>0.5253 | 0.21  |
| rs17880825 | 1.02 (0.52-1.99)<br>0.9619 | 1.66 (0.93-2.94)<br>0.0837 | 1.32 (0.55-3.17)<br>0.5356 | 0.71 (0.16-3.15)<br>0.6564 | 0.92  |
| rs1045968  | 1.17 (0.88-1.54)<br>0.2813 | 1.08 (0.87-1.35)<br>0.488  | 1.06 (0.74-1.50)<br>0.7591 | 1.76 (0.97-3.22)<br>0.065  | 0.39  |
| rs1050629  | 1.53 (0.81-2.92)<br>0.1917 | 1.28 (0.83-1.96)<br>0.2606 | 0.92 (0.42-2.05)<br>0.8419 | 1.37 (0.31-6.05)<br>0.6821 | 0.97  |
| rs2075993  | 0.96 (0.78-1.18)<br>0.6851 | 0.80 (0.68-0.94)<br>0.0071 | 0.87 (0.67-1.13)<br>0.2869 | 0.93 (0.63-1.39)<br>0.7341 | 0.34  |
| kgp1460594 | 1.65 (1.15-2.36)<br>0.0062 | 1.40 (1.04-1.87)<br>0.0259 | 0.91 (0.60-1.37)<br>0.6389 | 0.88 (0.42-1.85)<br>0.7291 | 0.09  |

\*OR adjusted for age, sex, ev1-ev4, using additive model (per-allele), #P-value for coefficient of product term included in the logistic model
