# Supplementary material for: MiRNA-Related SNPs and Risk of Esophageal Adenocarcinoma and Barrett’s Esophagus: Post Genome-Wide Association Analysis in the BEACON Consortium
Source: PubMed Central journal article supplement (PMC4454432; doi:10.1371/journal.pone.0128617), 2015-06-03
Supplement: pone.0128617.s010.pdf [file pone.0128617.s010.pdf]

**S6 Table. MiRNA-related SNPs and risk of BE stratified by smoking history or BMI.**

**A.**

| SNP        | Pack-years                 |                            |                            |                            |                            | P-int |
|------------|----------------------------|----------------------------|----------------------------|----------------------------|----------------------------|-------|
|            | 0                          | >0 & <15                   | 15-29                      | 30-44                      | 45+                        |       |
|            | OR (95% CI)<br>P           | OR (95% CI)<br>P           | OR (95% CI)<br>P           | OR (95% CI)<br>P           | OR (95% CI)<br>P           |       |
| rs3785722  | 0.87 (0.76-0.99)<br>0.0391 | 0.87 (0.69-1.09)<br>0.22   | 0.96 (0.75-1.24)<br>0.7665 | 0.77 (0.58-1.02)<br>0.0681 | 0.94 (0.73-1.20)<br>0.616  | 0.39  |
| rs8192593  | 0.56 (0.39-0.81)<br>0.0023 | 0.66 (0.37-1.18)<br>0.161  | 1.73 (0.92-3.25)<br>0.0876 | 0.89 (0.42-1.90)<br>0.7621 | 1.01 (0.54-1.89)<br>0.9829 | 0.25  |
| rs1043681  | 0.89 (0.77-1.03)<br>0.1072 | 0.89 (0.71-1.14)<br>0.3603 | 0.87 (0.67-1.14)<br>0.3091 | 0.71 (0.51-0.97)<br>0.0308 | 1.04 (0.80-1.35)<br>0.7921 | 0.82  |
| rs10906086 | 1.07 (0.93-1.23)<br>0.3616 | 1.16 (0.93-1.43)<br>0.186  | 1.06 (0.83-1.35)<br>0.6517 | 1.47 (1.11-1.94)<br>0.0066 | 0.90 (0.70-1.16)<br>0.4166 | 0.34  |

**B.**

| SNP        | BMI                        |                            |                            |                            | P-int |
|------------|----------------------------|----------------------------|----------------------------|----------------------------|-------|
|            | <25                        | 25-29.9                    | 30-34.9                    | 35+                        |       |
|            | OR (95% CI)<br>P           | OR (95% CI)<br>P           | OR (95% CI)<br>P           | OR (95% CI)<br>P           |       |
| rs3785722  | 0.87 (0.73-1.03)<br>0.1078 | 0.90 (0.78-1.03)<br>0.1122 | 0.80 (0.65-0.99)<br>0.0399 | 0.94 (0.69-1.27)<br>0.6744 | 0.47  |
| rs8192593  | 0.78 (0.49-1.24)<br>0.3014 | 0.78 (0.55-1.12)<br>0.179  | 0.50 (0.29-0.86)<br>0.0122 | 1.07 (0.45-2.52)<br>0.879  | 0.63  |
| rs1043681  | 0.89 (0.74-1.07)<br>0.2142 | 0.82 (0.71-0.95)<br>0.0064 | 1.02 (0.81-1.28)<br>0.8652 | 1.21 (0.86-1.70)<br>0.267  | 0.08  |
| rs10906086 | 1.26 (1.06-1.49)<br>0.0088 | 0.97 (0.84-1.10)<br>0.6096 | 1.08 (0.87-1.34)<br>0.485  | 1.09 (0.80-1.47)<br>0.5923 | 0.06  |

\*OR adjusted for age, sex, ev1-ev4, using additive model (per-allele), #P-value for coefficient of product term included in the logistic model
