# Supplementary material for: MiRNA-Related SNPs and Risk of Esophageal Adenocarcinoma and Barrett’s Esophagus: Post Genome-Wide Association Analysis in the BEACON Consortium
Source: PubMed Central journal article supplement (PMC4454432; doi:10.1371/journal.pone.0128617), 2015-06-03
Supplement: pone.0128617.s011.pdf [file pone.0128617.s011.pdf]

**S7 Table. MiRNA-related SNPs and risk of EA/BE.**

|    | Category   | SNP        | Gene      | Alleles <sup>†</sup> | Controls |                  | EA/BE cases |                  | OR*  | 95% CI      | P      | q    |
|----|------------|------------|-----------|----------------------|----------|------------------|-------------|------------------|------|-------------|--------|------|
|    |            |            |           |                      | N        | MAF <sup>‡</sup> | N           | MAF <sup>‡</sup> |      |             |        |      |
| 1  | Target     | rs1644730  | RDH8      | A/T                  | 3200     | 0.473            | 5776        | 0.448            | 0.91 | (0.85-0.97) | 0.0026 | 0.75 |
| 2  | miRNA      | rs12534337 | miR-4467  | A/G                  | 3203     | 0.042            | 5778        | 0.053            | 1.27 | (1.09-1.48) | 0.0027 | 0.75 |
| 3  | miRNA      | rs3785722  | miR-1269b | A/G                  | 3204     | 0.449            | 5779        | 0.428            | 0.91 | (0.86-0.97) | 0.0049 | 0.80 |
| 4  | miRNA      | rs7000768  | miR-3686  | G/A                  | 3205     | 0.304            | 5779        | 0.323            | 1.09 | (1.02-1.17) | 0.0104 | 0.80 |
| 5  | miRNA      | rs10906086 | miR-548ak | C/A                  | 3204     | 0.469            | 5776        | 0.487            | 1.09 | (1.02-1.16) | 0.0106 | 0.80 |
| 6  | miRNA      | rs7526812  | miR-3117  | C/T                  | 3205     | 0.151            | 5778        | 0.162            | 1.12 | (1.03-1.22) | 0.0112 | 0.80 |
| 7  | Biogenesis | rs8192593  | TARBP2    | T/C                  | 3202     | 0.040            | 5776        | 0.035            | 0.81 | (0.69-0.96) | 0.0123 | 0.80 |
| 8  | miRNA      | rs2114358  | miR-1206  | G/A                  | 3205     | 0.390            | 5779        | 0.409            | 1.08 | (1.02-1.16) | 0.0139 | 0.80 |
| 9  | Target     | rs1043681  | THAP3     | C/T                  | 3205     | 0.316            | 5779        | 0.304            | 0.92 | (0.86-0.98) | 0.0153 | 0.80 |
| 10 | Target     | rs1050629  | MLF2      | A/G                  | 3204     | 0.025            | 5779        | 0.031            | 1.27 | (1.04-1.55) | 0.0166 | 0.80 |
| 11 | Target     | rs1045968  | PRRT2     | A/C                  | 3204     | 0.141            | 5778        | 0.154            | 1.12 | (1.02-1.22) | 0.0167 | 0.80 |
| 12 | miRNA      | rs12564376 | miR-4421  | A/G                  | 3205     | 0.039            | 5779        | 0.032            | 0.81 | (0.69-0.97) | 0.0184 | 0.80 |
| 13 | Target     | rs2075993  | E2F2      | T/C                  | 3204     | 0.499            | 5778        | 0.483            | 0.93 | (0.87-0.99) | 0.0197 | 0.80 |
| 14 | Biogenesis | rs12044203 | EIF2C4    | A/G                  | 3195     | 0.021            | 5772        | 0.014            | 0.75 | (0.58-0.96) | 0.0209 | 0.80 |
| 15 | Biogenesis | rs4351606  | EIF2C3    | A/G                  | 3203     | 0.057            | 5776        | 0.048            | 0.85 | (0.74-0.98) | 0.0242 | 0.80 |
| 16 | Target     | rs1043641  | ACBD3     | A/G                  | 3205     | 0.172            | 5779        | 0.159            | 0.91 | (0.83-0.99) | 0.0267 | 0.80 |
| 17 | Biogenesis | rs2944760  | EIF2C2    | C/A                  | 3199     | 0.199            | 5778        | 0.189            | 0.91 | (0.84-0.99) | 0.0272 | 0.80 |
| 18 | Target     | rs11550670 | STXBP6    | T/C                  | 3202     | 0.204            | 5771        | 0.219            | 1.09 | (1.01-1.18) | 0.0278 | 0.80 |
| 19 | miRNA      | rs3787547  | miR-4756  | A/G                  | 3203     | 0.435            | 5779        | 0.416            | 0.93 | (0.87-0.99) | 0.0281 | 0.80 |
| 20 | Biogenesis | rs11247946 | LIN28     | G/A                  | 3205     | 0.345            | 5778        | 0.329            | 0.93 | (0.87-0.99) | 0.0312 | 0.80 |
| 21 | miRNA      | rs653667   | miR-4632  | G/T                  | 3177     | 0.367            | 5700        | 0.352            | 0.93 | (0.87-0.99) | 0.0315 | 0.80 |
| 22 | Biogenesis | kgp1460594 | XPO5      | A/G                  | 3205     | 0.075            | 5776        | 0.086            | 1.14 | (1.01-1.28) | 0.0318 | 0.80 |
| 23 | Biogenesis | rs595055   | EIF2C1    | C/T                  | 3203     | 0.142            | 5778        | 0.127            | 0.90 | (0.82-0.99) | 0.0342 | 0.80 |
| 24 | Target     | rs11169571 | ATF1      | C/T                  | 3204     | 0.391            | 5778        | 0.415            | 1.07 | (1.00-1.14) | 0.0357 | 0.80 |
| 25 | Target     | rs9804386  | MORN4     | C/T                  | 3205     | 0.200            | 5779        | 0.217            | 1.09 | (1.00-1.18) | 0.0375 | 0.80 |
| 26 | miRNA      | rs10862193 | miR-617   | G/A                  | 3201     | 0.428            | 5769        | 0.415            | 0.93 | (0.88-1.00) | 0.0387 | 0.80 |
| 27 | Target     | rs8044745  | NECAB2    | T/C                  | 3205     | 0.050            | 5777        | 0.043            | 0.85 | (0.73-0.99) | 0.0395 | 0.80 |
| 28 | Target     | rs17465826 | SF3A3     | G/T                  | 3204     | 0.041            | 5774        | 0.045            | 1.18 | (1.01-1.39) | 0.0415 | 0.80 |
| 29 | Target     | rs1367     | SCUBE2    | G/A                  | 3205     | 0.075            | 5777        | 0.066            | 0.88 | (0.78-1.00) | 0.0441 | 0.80 |
| 30 | Biogenesis | rs7702984  | DROSHA    | G/A                  | 3204     | 0.012            | 5778        | 0.009            | 0.73 | (0.54-1.00) | 0.0466 | 0.80 |
| 31 | miRNA      | rs12461701 | miR-3188  | A/G                  | 3204     | 0.278            | 5776        | 0.263            | 0.93 | (0.87-1.00) | 0.0477 | 0.80 |

<sup>†</sup>Minor/major alleles, <sup>‡</sup>Minor allele frequency, \*OR adjusted for age, sex, ev1-ev4, using additive model (per-allele). Variants highlighted in yellow were nominally significant in both the EA and BE analysis.
