# Supplementary material for: MiRNA-Related SNPs and Risk of Esophageal Adenocarcinoma and Barrett’s Esophagus: Post Genome-Wide Association Analysis in the BEACON Consortium
Source: PubMed Central journal article supplement (PMC4454432; doi:10.1371/journal.pone.0128617), 2015-06-03
Supplement: pone.0128617.s012.pdf [file pone.0128617.s012.pdf]

**S8 Table. Five significant miRNA-related SNPs from Ye et al. (40) and risk of EA (A) or BE (B).**

**A.**

|   | SNP        | Gene           | Alleles <sup>†</sup> | Controls |                  | EA cases |                  | OR*  | 95% CI      | P     |
|---|------------|----------------|----------------------|----------|------------------|----------|------------------|------|-------------|-------|
|   |            |                |                      | N        | MAF <sup>‡</sup> | N        | MAF <sup>‡</sup> |      |             |       |
| 1 | rs213210   | pri-miR-219-1  | G/A                  | 3204     | 0.069            | 2491     | 0.080            | 1.12 | (0.96-1.30) | 0.147 |
| 2 | rs6505162  | miR-423, -3184 | C/A                  | 3207     | 0.455            | 2495     | 0.455            | 1.04 | (0.96-1.12) | 0.348 |
| 3 | rs14035    | RAN            | A/G                  | 3206     | 0.310            | 2494     | 0.316            | 1.04 | (0.95-1.13) | 0.398 |
| 4 | rs11614913 | miR-196a-2     | T/C                  | 3204     | 0.402            | 2495     | 0.416            | 1.02 | (0.94-1.10) | 0.629 |
| 5 | rs11077    | XPO5           | C/A                  | 3206     | 0.415            | 2495     | 0.423            | 1.01 | (0.93-1.10) | 0.749 |

**B.**

|   | SNP        | Gene           | Alleles <sup>†</sup> | Controls |                  | BE cases |                  | OR*  | 95% CI      | P     |
|---|------------|----------------|----------------------|----------|------------------|----------|------------------|------|-------------|-------|
|   |            |                |                      | N        | MAF <sup>‡</sup> | N        | MAF <sup>‡</sup> |      |             |       |
| 1 | rs213210   | pri-miR-219-1  | G/A                  | 3201     | 0.069            | 3284     | 0.074            | 1.03 | (0.90-1.19) | 0.623 |
| 2 | rs6505162  | miR-423, -3184 | C/A                  | 3204     | 0.455            | 3285     | 0.449            | 1.01 | (0.94-1.08) | 0.831 |
| 3 | rs14035    | RAN            | A/G                  | 3203     | 0.310            | 3288     | 0.304            | 0.99 | (0.92-1.07) | 0.785 |
| 4 | rs11614913 | miR-196a-2     | T/C                  | 3201     | 0.402            | 3285     | 0.410            | 1.00 | (0.93-1.07) | 0.993 |
| 5 | rs11077    | XPO5           | C/A                  | 3203     | 0.415            | 3287     | 0.427            | 1.04 | (0.97-1.12) | 0.305 |

<sup>†</sup>Minor/major alleles, <sup>‡</sup>Minor allele frequency, \*OR adjusted for age, sex, ev1-ev4, using additive model (per-allele)
